# Supplementary material for: Automated database-guided expert-supervised orientation for immunophenotypic diagnosis and classification of acute leukemia
Source: PubMed Central journal article supplement — Leukemia. 2017 Dec 1;32(4):874–81. doi: 10.1038/leu.2017.313 (PMC5886046; doi:10.1038/leu.2017.313), 2017-12-01
Supplement: leu2017313x2.pdf [file leu2017313x2.pdf]

Supplemental Table 4. Details of Typical T, B, or Myeloid with mixed cells cases

| Final diagnosis<br>(WHO 2008) | Type of tested<br>sample | type of<br>coagulant | Disease phase | Gender | Age<br>(years) |          |          |                |             |             |             |               |               |               |               |               |               |       |       |       | % M/T/B | % Unclassified | % Immature |
|-------------------------------|--------------------------|----------------------|---------------|--------|----------------|----------|----------|----------------|-------------|-------------|-------------|---------------|---------------|---------------|---------------|---------------|---------------|-------|-------|-------|---------|----------------|------------|
|                               |                          |                      |               |        |                | % Main T | % Main B | % Main Myeloid | % Mixed T/B | % Mixed T/M | % Mixed M/B | % Sector T->B | % Sector T->M | % Sector B->T | % Sector B->M | % Sector M->T | % Sector M->B |       |       |       |         |                |            |
| AML                           | BM                       | heparin              | diagnosis     | M      | 47.15          | 0        | 0        | 29,8           | 0           | 0           | 0           | 0             | 0             | 0             | 0             | 0             | 0             | 0     | 35,41 | 34,79 | 0       |                |            |
| AML                           | BM                       | heparin              | diagnosis     | V      | 51.98          | 0        | 0        | 59,83          | 0           | 0           | 0           | 0             | 0             | 0             | 0             | 0             | 0             | 0     | 21,84 | 18,32 | 0       |                |            |
| AML                           | BM                       | heparin              | diagnosis     | F      | 71.6           | 0        | 0        | 47,55          | 0           | 0           | 1,07        | 0             | 0             | 0             | 0             | 0             | 0             | 42,96 | 0     | 8,43  | 0       |                |            |
| AML                           | BM                       | Heparin              | Diagnosis     | F      | 73             | 0        | 0        | 78,81          | 0           | 0           | 1,1         | 0             | 0             | 0             | 0             | 0             | 0             | 18,22 | 0     | 1,88  | 0       |                |            |
| AML                           | BM                       | heparin              | diagnosis     | M      | 82.2           | 0        | 0        | 94,41          | 0           | 0           | 1,33        | 0             | 0             | 0             | 0             | 0             | 0             | 4,26  | 0     | 0     | 0       |                |            |
| AML                           | BM                       | EDTA                 | Diagnosis     | M      | 64             | 0        | 0        | 95,66          | 0           | 0           | 1,35        | 0             | 0             | 0             | 0             | 0             | 0             | 2,88  | 0     | 0,1   | 0       |                |            |
| AML                           | BM                       | heparin              | diagnosis     | M      | 7.56           | 0        | 0        | 61,68          | 0           | 0           | 1,42        | 0             | 0             | 0             | 0             | 0             | 0             | 28    | 0     | 5,08  | 3,82    |                |            |
| AML                           | BM                       | heparin              | diagnosis     | M      | 54.6           | 0        | 0        | 92,67          | 0           | 0           | 1,43        | 0             | 0             | 0             | 0             | 0             | 0             | 5,61  | 0     | 0,29  | 0       |                |            |
| AML                           | BM                       | heparin              | diagnosis     | M      | 68.9           | 0        | 0        | 93,58          | 0           | 0           | 1,43        | 0             | 0             | 0             | 0             | 0             | 0             | 4,99  | 0     | 0     | 0       |                |            |
| AML                           | BM                       | heparin              | diagnosis     | F      | 62.4           | 0        | 0        | 85,12          | 0           | 0           | 1,46        | 0             | 0             | 0             | 0             | 0             | 0             | 13,4  | 0     | 0,02  | 0       |                |            |
| AML                           | PB                       | heparin              | diagnosis     | F      | 73.8           | 0        | 0        | 91,82          | 0           | 0           | 1,66        | 0             | 0             | 0             | 0             | 0             | 0             | 6,51  | 0     | 0,01  | 0       |                |            |
| AML                           | BM                       | EDTA                 | Diagnosis     | M      | 60             | 0        | 0        | 91,53          | 0           | 0           | 1,72        | 0             | 0             | 0             | 0             | 0             | 0             | 5,47  | 0     | 1,28  | 0       |                |            |
| AML                           | BM                       | EDTA                 | Diagnosis     | M      | 76             | 0        | 0        | 92,03          | 0           | 0           | 1,79        | 0             | 0             | 0             | 0             | 0             | 0             | 5,72  | 0     | 0,46  | 0       |                |            |
| AML                           | BM                       | heparin              | diagnosis     | F      | 67.24          | 0        | 0        | 93,47          | 0           | 0           | 1,85        | 0             | 0             | 0             | 0             | 0             | 0             | 4,67  | 0     | 0,01  | 0       |                |            |
| AML                           | BM                       | heparin              | diagnosis     | M      | 65.38          | 0        | 0        | 93,93          | 0           | 0           | 1,93        | 0             | 0             | 0             | 0             | 0             | 0             | 4,14  | 0     | 0     | 0       |                |            |
| AML                           | BM                       | EDTA                 | Diagnosis     | F      | 69             | 0        | 0        | 95,04          | 0           | 0           | 1,93        | 0             | 0             | 0             | 0             | 0             | 0             | 2,19  | 0     | 0,83  | 0       |                |            |
| AML                           | BM                       | heparin              | diagnosis     | M      | 80             | 0        | 0        | 90,94          | 0           | 0           | 2,06        | 0             | 0             | 0             | 0             | 0             | 0             | 5,43  | 1,57  | 0     | 0       |                |            |
| AML                           | BM                       | heparin              | diagnosis     | F      | 79.5           | 0        | 0        | 66,93          | 0           | 0           | 2,12        | 0             | 0             | 0             | 0             | 0             | 0             | 30,73 | 0     | 0,22  | 0       |                |            |
| AML                           | BM                       | heparin              | diagnosis     | F      | 62.1           | 0        | 0        | 67,29          | 0           | 0           | 2,25        | 0             | 0             | 0             | 0             | 0             | 0             | 30,2  | 0     | 0,27  | 0       |                |            |
| AML                           | BM                       | Heparin              | Diagnosis     | M      | 54             | 0        | 0        | 88,35          | 0           | 0           | 2,45        | 0             | 0             | 0             | 0             | 0             | 0             | 9,21  | 0     | 0     | 0       |                |            |
| AML                           | BM                       | heparin              | diagnosis     | M      | 57.2           | 0        | 0        | 92,82          | 0           | 0           | 2,64        | 0             | 0             | 0             | 0             | 0             | 0             | 4,23  | 0     | 0,31  | 0       |                |            |
| AML                           | BM                       | heparin              | diagnosis     | F      | 64             | 0        | 0        | 94,35          | 0           | 0           | 2,69        | 0             | 0             | 0             | 0             | 0             | 0             | 2,75  | 0     | 0,21  | 0       |                |            |
| AML                           | PB                       | heparin              | diagnosis     | V      | 48.07          | 0        | 0        | 88,46          | 0           | 0           | 2,7         | 0             | 0             | 0             | 0             | 0             | 0             | 8,84  | 0     | 0     | 0       |                |            |
| AML                           | PB                       | EDTA                 | Diagnosis     | F      | 84             | 0        | 0        | 91,88          | 0           | 0           | 2,76        | 0             | 0             | 0             | 0             | 0             | 0             | 5,35  | 0     | 0,01  | 0       |                |            |
| AML                           | BM                       | heparin              | diagnosis     | M      | 70.2           | 0        | 0        | 92,37          | 0           | 0           | 2,77        | 0             | 0             | 0             | 0             | 0             | 0             | 4,86  | 0     | 0     | 0       |                |            |
| AML                           | BM                       | EDTA                 | Diagnosis     | M      | 65             | 0        | 0        | 66,55          | 0           | 0           | 3,73        | 0             | 0             | 0             | 0             | 0             | 0             | 28,7  | 0     | 1,03  | 0       |                |            |
| AML                           | BM                       | heparin              | diagnosis     | M      | 65.5           | 0        | 0        | 92,97          | 0           | 0           | 3,75        | 0             | 0             | 0             | 0             | 0             | 0             | 3,03  | 0     | 0,25  | 0       |                |            |
| AML                           | BM                       | heparin              | diagnosis     | F      | 64.2           | 0        | 0        | 71,48          | 0           | 0           | 3,83        | 0             | 0             | 0             | 0             | 0             | 0             | 24,68 | 0     | 0     | 0       |                |            |
| AML                           | BM                       | EDTA                 | Diagnosis     | F      | 58             | 0        | 0        | 75,11          | 0           | 0           | 3,97        | 0             | 0             | 0             | 0             | 0             | 0             | 20,82 | 0     | 0,11  | 0       |                |            |
| AML                           | BM                       | EDTA                 | Diagnosis     | F      | 75             | 0        | 0        | 87,7           | 0           | 0           | 4,01        | 0             | 0             | 0             | 0             | 0             | 0             | 5,74  | 0     | 2,55  | 0       |                |            |
| AML                           | BM                       | heparin              | diagnosis     | M      | 78.94          | 0        | 0        | 89,19          | 0           | 0           | 4,04        | 0             | 0             | 0             | 0             | 0             | 0             | 5,99  | 0     | 0,78  | 0       |                |            |
| AML                           | BM                       | heparin              | diagnosis     | M      | 15.77          | 0        | 0        | 87,33          | 0           | 0           | 4,12        | 0             | 0             | 0             | 0             | 0             | 0             | 8,54  | 0     | 0,01  | 0       |                |            |
| AML                           | BM                       | heparin              | diagnosis     | M      | 8.21           | 0        | 0        | 71,31          | 0           | 0           | 4,28        | 0             | 0             | 0             | 0             | 0             | 0             | 16,66 | 0     | 6,65  | 1,09    |                |            |
| AML                           | PB                       | heparin              | diagnosis     | M      | 0.85           | 0        | 0        | 91,45          | 0           | 0           | 4,52        | 0             | 0             | 0             | 0             | 0             | 0             | 4,01  | 0     | 0,01  | 0       |                |            |
| AML                           | PB                       | EDTA                 | Diagnosis     | M      | 81             | 0        | 0        | 65,71          | 0           | 0           | 4,81        | 0             | 0             | 0             | 0             | 0             | 0             | 29,31 | 0     | 0,17  | 0       |                |            |
| AML                           | BM                       | EDTA                 | Diagnosis     | M      | 56             | 0        | 0        | 74,06          | 0           | 0           | 5,44        | 0             | 0             | 0             | 0             | 0             | 0             | 20,43 | 0     | 0,06  | 0       |                |            |
| AML                           | BM                       | heparin              | diagnosis     | F      | 58             | 0        | 0        | 14,7           | 0           | 0           | 5,45        | 0             | 0             | 0             | 0             | 0             | 0             | 78,27 | 0     | 1,59  | 0       |                |            |
| AML                           | BM                       | heparin              | diagnosis     | M      | 64.50          | 0        | 0        | 54,12          | 0           | 0           | 5,57        | 0             | 0             | 0             | 0             | 0             | 0             | 40,29 | 0     | 0,02  | 0       |                |            |
| MPAL                          | BM                       | heparin              | diagnosis     | F      | 50.1           | 0        | 0        | 56,12          | 0           | 0           | 5,58        | 0             | 0             | 0             | 0             | 0             | 0             | 30,39 | 0     | 6,76  | 1,14    |                |            |
| AML                           | PB                       | heparin              | diagnosis     | M      | 64.9           | 0        | 0        | 87,38          | 0           | 0           | 5,59        | 0             | 0             | 0             | 0             | 0             | 0             | 7,03  | 0     | 0     | 0       |                |            |
| AML                           | BM                       | heparin              | diagnosis     | F      | 66             | 0        | 0        | 88,73          | 0           | 0           | 5,61        | 0             | 0             | 0             | 0             | 0             | 0             | 5,65  | 0     | 0,01  | 0       |                |            |
| AML                           | BM                       | EDTA                 | Diagnosis     | F      | 52             | 0        | 0        | 89,77          | 0           | 0           | 5,62        | 0             | 0             | 0             | 0             | 0             | 0             | 4,41  | 0     | 0,2   | 0       |                |            |
| AML                           | PB                       | EDTA                 | Diagnosis     | F      | 67             | 0        | 0        | 81,44          | 0           | 0           | 5,77        | 0             | 0             | 0             | 0             | 0             | 0             | 12,78 | 0     | 0,01  | 0       |                |            |
| AML                           | BM                       | heparin              | diagnosis     | F      | 61.9           | 0        | 0        | 85,86          | 0           | 0           | 6,08        | 0             | 0             | 0             | 0             | 0             | 0             | 8,05  | 0     | 0     | 0       |                |            |
| AML                           | BM                       | not known            | Diagnosis     | M      | 48             | 0        | 0        | 91,78          | 0           | 0           | 6,12        | 0             | 0             | 0             | 0             | 0             | 0             | 2,1   | 0     | 0     | 0       |                |            |
| AML                           | BM                       | not known            | Diagnosis     | M      | 67             | 0        | 0        | 88,09          | 0           | 0           | 6,2         | 0             | 0             | 0             | 0             | 0             | 0             | 5,67  | 0     | 0,04  | 0       |                |            |
| AML                           | BM                       | EDTA                 | Diagnosis     | F      | 67             | 0        | 0        | 71,58          | 0           | 0           | 6,21        | 0             | 0             | 0             | 0             | 0             | 0             | 19,86 | 0     | 2,35  | 0       |                |            |
| AML                           | BM                       | EDTA                 | Diagnosis     | M      | 10             | 0        | 0        | 86,17          | 0           | 0           | 6,77        | 0             | 0             | 0             | 0             | 0             | 0             | 7,05  | 0     | 0     | 0       |                |            |
| AML                           | BM                       | heparin              | diagnosis     | V      | 50.73          | 0        | 0        | 74,22          | 0           | 0           | 6,84        | 0             | 0             | 0             | 0             | 0             | 0             | 18,94 | 0     | 0     | 0       |                |            |
| AML                           | BM                       | heparin              | diagnosis     | M      | 11.50          | 0        | 0        | 83,1           | 0           | 0           | 7,24        | 0             | 0             | 0             | 0             | 0             | 0             | 9,65  | 0     | 0     | 0       |                |            |
| AML                           | BM                       | heparin              | diagnosis     | M      | 71             | 0        | 0        | 88,14          | 0           | 0           | 8,3         | 0             | 0             | 0             | 0             | 0             | 0             | 3,5   | 0     | 0,06  | 0       |                |            |
| AML                           | BM                       | EDTA                 | Diagnosis     | M      | 66             | 0        | 0        | 89,42          | 0           | 0           | 8,31        | 0             | 0             | 0             | 0             | 0             | 0             | 1,86  | 0     | 0,41  | 0       |                |            |

| Final diagnosis (WHO 2008) | Type of tested sample | type of coagulant | Disease phase | Gender | Age (years) | % Main T | % Main B | % Main Myeloid | % Mixed T/B | % Mixed T/M | % Mixed M/B | % Sector T->B | % Sector T->M | % Sector B->T | % Sector B->M | % Sector M->T | % Sector M->B | % M/T/B | % Unclassified | % Immature |
|----------------------------|-----------------------|-------------------|---------------|--------|-------------|----------|----------|----------------|-------------|-------------|-------------|---------------|---------------|---------------|---------------|---------------|---------------|---------|----------------|------------|
| AML                        | BM                    | heparin           | diagnosis     | M      | 77.81       | 0        | 0        | 80,72          | 0           | 0           | 8,32        | 0             | 0             | 0             | 0             | 0             | 9,44          | 1,48    | 0,04           | 0          |
| AML                        | BM                    | heparin           | diagnosis     | M      | 75.23       | 0        | 0        | 59,04          | 0           | 0           | 8,56        | 0             | 0             | 0             | 0             | 0             | 31,24         | 0       | 1,17           | 0          |
| AML                        | BM                    | heparin           | diagnosis     | M      | 7.30        | 0        | 0        | 78,34          | 0           | 0           | 8,74        | 0             | 0             | 0             | 0             | 0             | 12,78         | 0       | 0,14           | 0          |
| AML                        | BM                    | EDTA              | Diagnosis     | M      | 72          | 0        | 0        | 85,85          | 0           | 0           | 8,78        | 0             | 0             | 0             | 0             | 0             | 5,37          | 0       | 0              | 0          |
| AML                        | BM                    | EDTA              | Diagnosis     | M      | 74          | 0        | 0        | 78,41          | 0           | 0           | 6,77        | 0             | 0             | 0             | 0             | 0             | 12,36         | 0       | 2,47           | 0          |
| AML                        | BM                    | EDTA              | Diagnosis     | F      | 0           | 0        | 0        | 85,6           | 0           | 0           | 10,09       | 0             | 0             | 0             | 0             | 0             | 4,31          | 0       | 0              | 0          |
| AML                        | BM                    | heparin           | diagnosis     | M      | 51.8        | 0        | 0        | 71,67          | 0           | 0           | 11,08       | 0             | 0             | 0             | 0             | 0             | 17,24         | 0       | 0,01           | 0          |
| AML                        | BM                    | EDTA              | Diagnosis     | M      | 83          | 0        | 0        | 74,22          | 0           | 0           | 11,24       | 0             | 0             | 0             | 0             | 0             | 14,18         | 0       | 0,36           | 0          |
| AML                        | BM                    | EDTA              | Diagnosis     | M      | 72          | 0        | 0        | 70,05          | 0           | 0           | 11,26       | 0             | 0             | 0             | 0             | 0             | 18,22         | 0       | 0,47           | 0          |
| AML                        | BM                    | EDTA              | Diagnosis     | M      | 74          | 0        | 0        | 71,56          | 0           | 0           | 13,06       | 0             | 0             | 0             | 0             | 0             | 15,37         | 0       | 0,01           | 0          |
| AML                        | BM                    | Heparin           | Diagnosis     | M      | 22          | 0        | 0        | 77,43          | 0           | 0           | 14,22       | 0             | 0             | 0             | 0             | 0             | 8,35          | 0       | 0,01           | 0          |
| AML                        | PB                    | heparin           | diagnosis     | M      | 1.12        | 0        | 0        | 73,69          | 0           | 0           | 15,56       | 0             | 0             | 0             | 0             | 0             | 10,32         | 0       | 0,44           | 0          |
| AML                        | BM                    | EDTA              | Diagnosis     | F      | 68          | 0        | 0        | 43,61          | 0           | 0           | 16          | 0             | 0             | 0             | 0             | 0             | 40,37         | 0       | 0,01           | 0          |
| MPAL                       | BM                    | Heparin           | Diagnosis     | M      | 5           | 0        | 0        | 11,09          | 0           | 0           | 18,08       | 0             | 0             | 0             | 0             | 0             | 40,92         | 0       | 23,46          | 6,45       |
| AML                        | BM                    | heparin           | diagnosis     | M      | 69.30       | 0        | 0        | 35,77          | 0           | 0           | 18,38       | 0             | 0             | 0             | 0             | 0             | 45,2          | 0       | 0,65           | 0          |
| AML                        | BM                    | Heparin           | Diagnosis     | F      | 17          | 0        | 0        | 57,38          | 0           | 0           | 18,41       | 0             | 0             | 0             | 0             | 0             | 24,14         | 0       | 0,07           | 0          |
| AML                        | BM                    | heparin           | diagnosis     | M      | 59.2        | 0        | 0        | 72,83          | 0           | 0           | 19,44       | 0             | 0             | 0             | 0             | 0             | 7,71          | 0       | 0,01           | 0          |
| AML                        | BM                    | EDTA              | Diagnosis     | F      |             | 0        | 0        | 57,55          | 0           | 0           | 18,99       | 0             | 0             | 0             | 0             | 0             | 23,35         | 0       | 0,12           | 0          |
| AML                        | BM                    | EDTA              | Diagnosis     | M      | 65          | 0        | 0        | 67,62          | 0           | 0           | 23,72       | 0             | 0             | 0             | 0             | 0             | 8,64          | 0       | 0,02           | 0          |
| AML                        | BM                    | EDTA              | Diagnosis     | M      | 82          | 0        | 0        | 65,69          | 0           | 0           | 25,94       | 0             | 0             | 0             | 0             | 0             | 7,53          | 0       | 0,84           | 0          |
| AML                        | BM                    | EDTA              | Diagnosis     | F      | 75          | 0        | 0        | 18,93          | 0           | 0           | 26,66       | 0             | 0             | 0             | 0             | 0             | 54,4          | 0       | 0,01           | 0          |
| AML                        | BM                    | heparin           | diagnosis     | F      | 77.2        | 0        | 0        | 45,38          | 0           | 0           | 28,47       | 0             | 0             | 0             | 0             | 0             | 26,15         | 0       | 0,01           | 0          |
| AML                        | BM                    | heparin           | diagnosis     | M      | 58.3        | 0        | 0        | 37,03          | 0           | 0           | 29,37       | 0             | 0             | 0             | 0             | 0             | 33,44         | 0       | 0,17           | 0          |
| AML                        | BM                    | EDTA              | Diagnosis     | F      | 37          | 0        | 0        | 16,36          | 0           | 0           | 35,9        | 0             | 0             | 0             | 0             | 0             | 47,73         | 0       | 0,01           | 0          |
| AML                        | BM                    | EDTA              | Diagnosis     | M      | 63          | 0        | 0        | 48,04          | 0           | 0           | 39,33       | 0             | 0             | 0             | 0             | 0             | 12,63         | 0       | 0,01           | 0          |
| AML                        | BM                    | heparin           | diagnosis     | F      | 34.8        | 0        | 0        | 29,97          | 0           | 1,37        | 0           | 0             | 0             | 0             | 0             | 56            | 0             | 0       | 3,76           | 8,91       |
| AML                        | BM                    | heparin           | diagnosis     | V      | 72.26       | 0        | 0        | 54,44          | 0           | 1,5         | 0           | 0             | 0             | 0             | 0             | 24,81         | 0             | 0       | 1,99           | 17,26      |
| AML                        | BM                    | heparin           | diagnosis     | M      | 70.11       | 0        | 0        | 94,41          | 0           | 1,58        | 0           | 0             | 0             | 0             | 0             | 3,73          | 0             | 0       | 0,27           | 0          |
| AML                        | BM                    | heparin           | diagnosis     | M      | 63.87       | 0        | 0        | 95,86          | 0           | 1,58        | 0           | 0             | 0             | 0             | 0             | 1,88          | 0             | 0       | 0,68           | 0          |
| MPAL                       | BM                    | heparin           | diagnosis     | F      | 51.2        | 0        | 0        | 33,92          | 0           | 2,03        | 0           | 0             | 0             | 0             | 0             | 58,62         | 0             | 0       | 2,18           | 3,25       |
| AML                        | BM                    | EDTA              | Diagnosis     | F      | 80          | 0        | 0        | 70,37          | 0           | 2,12        | 0           | 0             | 0             | 0             | 0             | 13,33         | 0             | 0       | 10,04          | 4,14       |
| AML                        | BM                    | Heparin           | Diagnosis     | M      | 76          | 0        | 0        | 93,06          | 0           | 2,12        | 0           | 0             | 0             | 0             | 0             | 4,18          | 0             | 0       | 0,65           | 0          |
| AML                        | BM                    | heparin           | diagnosis     | M      | 41          | 0        | 0        | 31,74          | 0           | 2,17        | 0           | 0             | 0             | 0             | 0             | 58,01         | 0             | 0       | 8,07           | 0          |
| AML                        | BM                    | heparin           | diagnosis     | M      | 55.9        | 0        | 0        | 84,2           | 0           | 2,18        | 0           | 0             | 0             | 0             | 0             | 9,59          | 0             | 0       | 2,45           | 1,59       |
| AML                        | BM                    | heparin           | diagnosis     | M      | 68.6        | 0        | 0        | 93,94          | 0           | 2,42        | 0           | 0             | 0             | 0             | 0             | 3,51          | 0             | 0       | 0,12           | 0          |
| AML                        | BM                    | EDTA              | Diagnosis     | M      | 77          | 0        | 0        | 44,1           | 0           | 3,03        | 0           | 0             | 0             | 0             | 0             | 50,57         | 0             | 0       | 2,3            | 0          |
| AML                        | BM                    | heparin           | diagnosis     | M      | 68.7        | 0        | 0        | 92,41          | 0           | 3,21        | 0           | 0             | 0             | 0             | 0             | 3,59          | 0             | 0       | 0,79           | 0          |
| AML                        | BM                    | EDTA              | Diagnosis     | F      | 57          | 0        | 0        | 91,07          | 0           | 3,19        | 0           | 0             | 0             | 0             | 0             | 5,55          | 0             | 0       | 0,19           | 0          |
| AML                        | BM                    | EDTA              | Diagnosis     | F      | 83          | 0        | 0        | 87,44          | 0           | 4,5         | 0           | 0             | 0             | 0             | 0             | 7,24          | 0             | 0       | 0,82           | 0          |
| AML                        | PB                    | EDTA              | Diagnosis     | F      | 68          | 0        | 0        | 91,7           | 0           | 6,1         | 0           | 0             | 0             | 0             | 0             | 2,17          | 0             | 0       | 0,03           | 0          |
| AML                        | BM                    | heparin           | diagnosis     | M      | 57          | 0        | 0        | 84,7           | 0           | 6,47        | 0           | 0             | 0             | 0             | 0             | 6,46          | 0             | 1,1     | 1,27           | 0          |
| AML                        | BM                    | heparin           | diagnosis     | F      | 9.71        | 0        | 0        | 28,94          | 0           | 6,6         | 0           | 0             | 0             | 0             | 0             | 4,46          | 0             | 0       | 23,64          | 36,35      |
| AML                        | PB                    | heparin           | diagnosis     | M      | 75.70       | 0        | 0        | 48,7           | 0           | 6,9         | 0           | 0             | 0             | 0             | 0             | 44,36         | 0             | 0       | 0,04           | 0          |
| AML                        | BM                    | heparin           | diagnosis     | M      | 1.57        | 0        | 0        | 62,72          | 0           | 6,91        | 0           | 0             | 0             | 0             | 0             | 19,04         | 0             | 0       | 0,36           | 10,98      |
| AML                        | BM                    | heparin           | diagnosis     | M      | 73.2        | 0        | 0        | 73,32          | 0           | 6,96        | 0           | 0             | 0             | 0             | 0             | 19,72         | 0             | 0       | 0              | 0          |
| AML                        | BM                    | Heparin           | Diagnosis     | M      | 1           | 0        | 0        | 65,56          | 0           | 8,07        | 0           | 0             | 0             | 0             | 0             | 26,37         | 0             | 0       | 0              | 0          |
| AML                        | BM                    | heparin           | diagnosis     | F      | 2.44        | 0        | 0        | 53,69          | 0           | 9,91        | 0           | 0             | 0             | 0             | 0             | 16,45         | 0             | 0       | 0,27           | 19,69      |
| AML                        | BM                    | heparin           | diagnosis     | F      | 77          | 0        | 0        | 84,1           | 0           | 10,61       | 0           | 0             | 0             | 0             | 0             | 4,78          | 0             | 0       | 0,51           | 0          |
| AML                        | BM                    | not known         | Diagnosis     | F      | 71          | 0        | 0        | 79,52          | 0           | 10,95       | 0           | 0             | 0             | 0             | 0             | 9,41          | 0             | 0       | 0,12           | 0          |
| AML                        | BM                    | heparin           | diagnosis     | M      | 45          | 0        | 0        | 67,14          | 0           | 11,01       | 0           | 0             | 0             | 0             | 0             | 6,78          | 0             | 0       | 13,21          | 1,86       |
| MPAL                       | BM                    | EDTA              |               | M      | 64          | 0        | 0        | 13,85          | 0           | 13,23       | 0           | 0             | 0             | 0             | 0             | 67,03         | 0             | 0       | 1,06           | 4,84       |
| AML                        | BM                    | heparin           | diagnosis     | F      | 60.7        | 0        | 0        | 74,31          | 0           | 12,48       | 0           | 0             | 0             | 0             | 0             | 13,18         | 0             | 0       | 0,02           | 0          |
| MPAL                       | BM                    | EDTA              | Diagnosis     | M      | 49          | 0        | 0        | 72,21          | 0           | 15,18       | 0           | 0             | 0             | 0             | 0             | 8,98          | 0             | 0       | 3,63           | 0          |

| Final diagnosis (WHO 2008) | Type of tested sample | type of coagulant | Disease phase | Gender | Age (years) | % Main T | % Main B | % Main Myeloid | % Mixed T/B | % Mixed T/M | % Mixed M/B | % Sector T->B | % Sector T->M | % Sector B->T | % Sector B->M | % Sector M->T | % Sector M->B | % M/T/B | % Unclassified | % Immature |
|----------------------------|-----------------------|-------------------|---------------|--------|-------------|----------|----------|----------------|-------------|-------------|-------------|---------------|---------------|---------------|---------------|---------------|---------------|---------|----------------|------------|
| AML                        | BM                    | heparin           | diagnosis     | M      | 68.8        | 0        | 0        | 35,03          | 0           | 17,89       | 0           | 0             | 0             | 0             | 0             | 47,08         | 0             | 0       | 0              | 0          |
| AML                        | BM                    | heparin           | diagnosis     | M      | 53.8        | 0        | 0        | 28,68          | 0           | 36,04       | 0           | 0             | 0             | 0             | 0             | 17,01         | 0             | 0       | 0,59           | 17,68      |
| AML                        | BM                    | EDTA              | Diagnosis     | F      | 81          | 0        | 0        | 62,9           | 0           | 10,64       | 0           | 0             | 0             | 0             | 0             | 22,23         | 0             | 1,35    | 2,88           | 0          |
| AML                        | BM                    | EDTA              | Diagnosis     | M      | 44          | 0        | 0        | 17,05          | 0           | 19,37       | 11,05       | 0             | 0             | 0             | 0             | 0             | 44,15         | 6,44    | 0,06           | 1,89       |
| AML                        | BM                    | EDTA              | Diagnosis     | M      | 76          | 0        | 0        | 77,09          | 0           | 2,48        | 18,33       | 0             | 0             | 0             | 0             | 0             | 2,02          | 0       | 0,08           | 0          |
| B-ALL                      | BM                    | EDTA              | Diagnosis     | M      | 6           | 0        | 85,1     | 0              | 0           | 0           | 1,34        | 0             | 0             | 0             | 12,97         | 0             | 0             | 0       | 0,6            | 0          |
| B-ALL                      | BM                    | not known         | Diagnosis     | F      | 6           | 0        | 93,17    | 0              | 0           | 0           | 1,62        | 0             | 0             | 0             | 5,19          | 0             | 0             | 0       | 0,02           | 0          |
| B-ALL                      | BM                    | heparin           | diagnosis     | F      | 68          | 0        | 94,73    | 0              | 0           | 0           | 1,63        | 0             | 0             | 0             | 3,64          | 0             | 0             | 0       | 0,01           | 0          |
| B-ALL                      | BM                    | EDTA              | Diagnosis     | F      | 11          | 0        | 91,26    | 0              | 0           | 0           | 2,07        | 0             | 0             | 0             | 5,25          | 0             | 0             | 0       | 1,43           | 0          |
| B-ALL                      | BM                    | heparin           | diagnosis     | M      | 32          | 0        | 69,59    | 0              | 0           | 0           | 2,21        | 0             | 0             | 0             | 27,79         | 0             | 0             | 0       | 0,41           | 0          |
| B-ALL                      | BM                    | EDTA              | Diagnosis     | M      | 6           | 0        | 88,17    | 0              | 0           | 0           | 2,57        | 0             | 0             | 0             | 9,23          | 0             | 0             | 0       | 0,03           | 0          |
| B-ALL                      | BM                    | Heparin           | Diagnosis     | F      | 5           | 0        | 84,7     | 0              | 0           | 0           | 2,64        | 0             | 0             | 0             | 11,33         | 0             | 0             | 0       | 1,34           | 0          |
| B-ALL                      | BM                    | EDTA              | Diagnosis     | M      | 1           | 0        | 89,46    | 0              | 0           | 0           | 2,7         | 0             | 0             | 0             | 7,62          | 0             | 0             | 0       | 0,21           | 0          |
| B-ALL                      | PB                    | EDTA              | Diagnosis     | M      | 2           | 0        | 68,35    | 0              | 0           | 0           | 3,11        | 0             | 0             | 0             | 26,94         | 0             | 0             | 0       | 1,6            | 0          |
| B-ALL                      | BM                    | not known         | Diagnosis     | M      | 6           | 0        | 94,78    | 0              | 0           | 0           | 3,23        | 0             | 0             | 0             | 1,99          | 0             | 0             | 0       | 0              | 0          |
| MPAL                       | BM                    | Heparin           | Diagnosis     | F      | 12          | 0        | 77,42    | 0              | 0           | 0           | 3,43        | 0             | 0             | 0             | 19,13         | 0             | 0             | 0       | 0,02           | 0          |
| B-ALL                      | BM                    | Heparin           | Diagnosis     | F      | 10          | 0        | 59,79    | 0              | 0           | 0           | 3,47        | 0             | 0             | 0             | 36,08         | 0             | 0             | 0       | 0,67           | 0          |
| B-ALL                      | BM                    | Heparin           | Diagnosis     | F      | 2           | 0        | 68,57    | 0              | 0           | 0           | 3,48        | 0             | 0             | 0             | 19,99         | 0             | 0             | 0       | 7,96           | 0          |
| B-ALL                      | PB                    | EDTA              | Diagnosis     | F      | 73          | 0        | 68,32    | 0              | 0           | 0           | 3,55        | 0             | 0             | 0             | 24,45         | 0             | 0             | 0       | 3,68           | 0          |
| B-ALL                      | PB                    | not known         | Diagnosis     | F      | 33          | 0        | 95,25    | 0              | 0           | 0           | 3,92        | 0             | 0             | 0             | 0             | 0             | 0             | 0       | 0,83           | 0          |
| B-ALL                      | BM                    | EDTA              | Diagnosis     | F      | 5           | 0        | 94,38    | 0              | 0           | 0           | 3,93        | 0             | 0             | 0             | 1,47          | 0             | 0             | 0       | 0,22           | 0          |
| B-ALL                      | BM                    | EDTA              | Diagnosis     | M      | 17          | 0        | 78,74    | 0              | 0           | 0           | 4,6         | 0             | 0             | 0             | 15,92         | 0             | 0             | 0       | 0,74           | 0          |
| B-ALL                      | PB                    | EDTA              | Diagnosis     | M      | 2           | 0        | 86,62    | 0              | 0           | 0           | 4,69        | 0             | 0             | 0             | 8,69          | 0             | 0             | 0       | 0              | 0          |
| B-ALL                      | BM                    | heparin           | diagnosis     | M      | 10.52       | 0        | 48,88    | 0              | 0           | 0           | 5,02        | 0             | 0             | 0             | 16,22         | 0             | 0             | 0       | 5,64           | 24,23      |
| B-ALL                      | BM                    | EDTA              | Diagnosis     | F      | 67          | 0        | 19,23    | 0              | 0           | 0           | 5,08        | 0             | 0             | 0             | 69,59         | 0             | 0             | 0       | 6,1            | 0          |
| B-ALL                      | BM                    | EDTA              | Relapse       | M      | 6           | 0        | 92,25    | 0              | 0           | 0           | 5,09        | 0             | 0             | 0             | 2,64          | 0             | 0             | 0       | 0,02           | 0          |
| B-ALL                      | BM                    | heparin           | diagnosis     | M      | 56          | 0        | 89,68    | 0              | 0           | 0           | 5,19        | 0             | 0             | 0             | 4,99          | 0             | 0             | 0       | 0,13           | 0          |
| B-ALL                      | BM                    | heparin           | diagnosis     | F      | 73          | 0        | 72,54    | 0              | 0           | 0           | 5,86        | 0             | 0             | 0             | 21,35         | 0             | 0             | 0       | 0,25           | 0          |
| B-ALL                      | BM                    | heparin           | diagnosis     | M      | 73          | 0        | 88,12    | 0              | 0           | 0           | 5,9         | 0             | 0             | 0             | 5,85          | 0             | 0             | 0       | 0,13           | 0          |
| B-ALL                      | BM                    | EDTA              | Diagnosis     | M      | 13          | 0        | 59,64    | 0              | 0           | 0           | 6,56        | 0             | 0             | 0             | 32,43         | 0             | 0             | 0       | 1,36           | 0          |
| B-ALL                      | BM                    | EDTA              | Diagnosis     | F      | 7           | 0        | 88,24    | 0              | 0           | 0           | 6,94        | 0             | 0             | 0             | 4,76          | 0             | 0             | 0       | 0,06           | 0          |
| B-ALL                      | BM                    | EDTA              | Diagnosis     | F      | 4           | 0        | 86,63    | 0              | 0           | 0           | 7,74        | 0             | 0             | 0             | 5,63          | 0             | 0             | 0       | 0,01           | 0          |
| B-ALL                      | BM                    | Heparin           | Diagnosis     | F      | 2           | 0        | 86,43    | 0              | 0           | 0           | 9,61        | 0             | 0             | 0             | 1,87          | 0             | 0             | 0       | 2,09           | 0          |
| B-ALL                      | BM                    | heparin           | diagnosis     | M      | 55          | 0        | 52,04    | 0              | 0           | 0           | 10,43       | 0             | 0             | 0             | 28,26         | 0             | 0             | 0       | 2,53           | 6,74       |
| B-ALL                      | BM                    | Heparin           | Diagnosis     | F      | 2           | 0        | 81,06    | 0              | 0           | 0           | 12,54       | 0             | 0             | 0             | 6,4           | 0             | 0             | 0       | 0,01           | 0          |
| B-ALL                      | BM                    | EDTA              | Diagnosis     | F      | 44          | 0        | 60,83    | 0              | 0           | 0           | 13,66       | 0             | 0             | 0             | 14,28         | 0             | 0             | 11,22   | 0,01           | 0          |
| MPAL                       | BM                    | Heparin           | Diagnosis     | F      | 12          | 0        | 11,78    | 0              | 0           | 0           | 14,37       | 0             | 0             | 0             | 73,74         | 0             | 0             | 0       | 0,11           | 0          |
| B-ALL                      | BM                    | Heparin           | Relapse       | M      | 6           | 0        | 52,26    | 0              | 0           | 0           | 16,45       | 0             | 0             | 0             | 30,62         | 0             | 0             | 0       | 0,67           | 0          |
| B-ALL                      | BM                    | heparin           | diagnosis     | M      | 62          | 0        | 66,11    | 0              | 0           | 0           | 17,05       | 0             | 0             | 0             | 13,29         | 0             | 0             | 0       | 1,31           | 2,23       |
| B-ALL                      | BM                    | Heparin           | Diagnosis     | M      | 3           | 0        | 57,98    | 0              | 0           | 0           | 18,54       | 0             | 0             | 0             | 23,43         | 0             | 0             | 0       | 0,05           | 0          |
| B-ALL                      | PB                    | EDTA              | Diagnosis     | F      | 79          | 0        | 49,22    | 0              | 0           | 0           | 22,68       | 0             | 0             | 0             | 19,27         | 0             | 0             | 0       | 0,45           | 8,38       |
| MPAL                       | BM                    | heparin           | diagnosis     | F      | 25          | 0        | 11,96    | 0              | 0           | 0           | 23,54       | 0             | 0             | 0             | 64,28         | 0             | 0             | 0       | 0,21           | 0          |
| B-ALL                      | BM                    | Heparin           | Diagnosis     | M      | 7           | 0        | 65,3     | 0              | 0           | 0           | 23,64       | 0             | 0             | 0             | 10,99         | 0             | 0             | 0       | 0,07           | 0          |
| B-ALL                      | BM                    | heparin           | diagnosis     | F      | 67          | 0        | 28,38    | 0              | 0           | 0           | 28,65       | 0             | 0             | 0             | 41,48         | 0             | 0             | 0       | 1,49           | 0          |
| B-ALL                      | BM                    | Heparin           | Diagnosis     | F      | 76          | 0        | 52,28    | 0              | 0           | 0           | 29,99       | 0             | 0             | 0             | 17,71         | 0             | 0             | 0       | 0,02           | 0          |
| B-ALL                      | BM                    | not known         | Diagnosis     | M      | 1           | 0        | 19,87    | 0              | 0           | 0           | 34,07       | 0             | 0             | 0             | 45,89         | 0             | 0             | 0       | 0,16           | 0          |
| B-ALL                      | PB                    | EDTA              | Relapse       | F      | 63          | 0        | 21,96    | 0              | 0           | 0           | 36,65       | 0             | 0             | 0             | 14,12         | 0             | 0             | 0       | 0              | 27,27      |
| B-ALL                      | BM                    | Heparin           | Diagnosis     | F      | 79          | 0        | 49,67    | 0              | 0           | 0           | 37,19       | 0             | 0             | 0             | 0             | 0             | 13,03         | 0       | 0,1            | 0          |
| B-ALL                      | BM                    | heparin           | diagnosis     | M      | 62          | 0        | 51,75    | 0              | 0           | 0           | 44,39       | 0             | 0             | 0             | 0             | 0             | 3,86          | 0       | 0              | 0          |
| B-ALL                      | BM                    | Heparin           | Diagnosis     | M      | 2           | 0        | 91,58    | 0              | 1,34        | 0           | 0           | 0             | 0             | 6,42          | 0             | 0             | 0             | 0       | 0,66           | 0          |
| B-ALL                      | BM                    | heparin           | diagnosis     | M      | 55          | 0        | 53,3     | 0              | 6,35        | 0           | 0           | 0             | 0             | 40,35         | 0             | 0             | 0             | 0       | 0              | 0          |
| B-ALL                      | BM                    | Heparin           | Diagnosis     | M      | 11          | 0        | 71,85    | 0              | 21,28       | 0           | 0           | 0             | 0             | 0             | 0             | 0             | 0             | 0       | 6,88           | 0          |
| B-ALL                      | BM                    | EDTA              | Diagnosis     | F      | 1           | 0        | 33,78    | 0              | 7,26        | 0           | 15,63       | 0             | 0             | 0             | 43,28         | 0             | 0             | 0       | 0,03           | 0          |

| Final diagnosis<br>(WHO 2008) | Type of tested<br>sample | type of<br>coagulant | Disease phase | Gender | Age<br>(years) |          |          |                |             |             |             |               |               |               |               |               |               |         |                |            |
|-------------------------------|--------------------------|----------------------|---------------|--------|----------------|----------|----------|----------------|-------------|-------------|-------------|---------------|---------------|---------------|---------------|---------------|---------------|---------|----------------|------------|
|                               |                          |                      |               |        |                | % Main T | % Main B | % Main Myeloid | % Mixed T/B | % Mixed T/M | % Mixed M/B | % Sector T->B | % Sector T->M | % Sector B->T | % Sector B->M | % Sector M->T | % Sector M->B | % M/T/B | % Unclassified | % Immature |
| T-ALL                         | BM                       | Heparin              | Diagnosis     | M      | 8              | 65,98    | 0        | 0              | 0           | 1,12        | 0           | 0             | 31,99         | 0             | 0             | 0             | 0             | 0       | 0,91           | 0          |
| T-ALL                         | BM                       | EDTA                 | Diagnosis     | F      | 39             | 92,03    | 0        | 0              | 0           | 1,89        | 0           | 0             | 6,06          | 0             | 0             | 0             | 0             | 0       | 0,02           | 0          |
| T-ALL                         | BM                       | EDTA                 | Diagnosis     | M      | 31             | 89,3     | 0        | 0              | 0           | 2,29        | 0           | 0             | 8,4           | 0             | 0             | 0             | 0             | 0       | 0,01           | 0          |
| T-ALL                         | BM                       | Heparin              | Diagnosis     | F      | 17             | 64,78    | 0        | 0              | 0           | 3,31        | 0           | 0             | 31,18         | 0             | 0             | 0             | 0             | 0       | 0,74           | 0          |
| T-ALL                         | BM                       | EDTA                 | Diagnosis     | M      | 12             | 83,15    | 0        | 0              | 0           | 5,83        | 0           | 0             | 10,9          | 0             | 0             | 0             | 0             | 0       | 0,11           | 0          |
| T-ALL                         | BM                       | EDTA                 | Diagnosis     | M      | 6              | 16,11    | 0        | 0              | 0           | 7,27        | 0           | 0             | 75,98         | 0             | 0             | 0             | 0             | 0       | 0,64           | 0          |
| T-ALL                         | BM                       | EDTA                 | Diagnosis     | M      | 27             | 59,23    | 0        | 0              | 0           | 9,05        | 0           | 0             | 24,72         | 0             | 0             | 0             | 0             | 0       | 4,21           | 2,79       |
| T-ALL                         | BM                       | heparin              | diagnosis     | M      | 39.5           | 90,66    | 0        | 0              | 1,61        | 0           | 0           | 7,72          | 0             | 0             | 0             | 0             | 0             | 0       | 0,02           | 0          |
| T-ALL                         | BM                       | EDTA                 | Diagnosis     | M      | 10             | 56,31    | 0        | 0              | 9,39        | 0           | 0           | 33,02         | 0             | 0             | 0             | 0             | 0             | 0       | 1,28           | 0          |
| T-ALL                         | BM                       | Heparin              | Diagnosis     | M      | 17             | 27,37    | 0        | 0              | 12,17       | 0           | 0           | 59,78         | 0             | 0             | 0             | 0             | 0             | 0       | 0,68           | 0          |
| MPAL                          | BM                       | Heparin              | Diagnosis     | M      | 7              | 35,62    | 0        | 0              | 34,88       | 5,9         | 0           | 23,13         | 0             | 0             | 0             | 0             | 0             | 0       | 0,46           | 0          |
| MPAL                          | BM                       | EDTA                 | Diagnosis     | M      | 13             | 30,02    | 0        | 0              | 47,53       | 0           | 0           | 0             | 0             | 0             | 0             | 0             | 0             | 0       | 22,45          | 0          |

Supplemental Table 5. Details of atypical cases

| Final diagnosis<br>(WHO 2008) | Type of tested |                   | Disease phase | Gender | Age<br>(years) | % Main T | % Main B | % Main Myeloid | % Mixed T/B | % Mixed T/M | % Mixed M/B | % Sector T->B | % Sector T->M | % Sector B->T | % Sector B->M | % Sector M->T | % Sector M->B | % M/T/B | % Unclassified | % Immature |
|-------------------------------|----------------|-------------------|---------------|--------|----------------|----------|----------|----------------|-------------|-------------|-------------|---------------|---------------|---------------|---------------|---------------|---------------|---------|----------------|------------|
|                               | sample         | type of coagulant |               |        |                |          |          |                |             |             |             |               |               |               |               |               |               |         |                |            |
| T-ALL                         | PB             | EDTA              | Relapse       | F      | 22             | 0        | 0        | 0              | 0           | 0           | 0           | 0             | 0             | 0             | 0             | 0             | 0             | 0       | 100            | 0          |
| T-ALL                         | PB             | EDTA              | Diagnosis     | M      | 62             | 0        | 0        | 0              | 0           | 5,67        | 0           | 0             | 0             | 0             | 0             | 85,82         | 0             | 0       | 0              | 8,51       |
| MPAL                          | BM             | EDTA              | Diagnosis     | M      | 0              | 0        | 0        | 1,97           | 0           | 0           | 6,52        | 0             | 0             | 0             | 0             | 0             | 17,92         | 73,58   | 0,01           | 0          |
| MPAL                          | BM             | Heparin           | Diagnosis     | F      | 10             | 0        | 0        | 5,05           | 0           | 5,51        | 0           | 0             | 0             | 0             | 9,85          | 0             | 0             | 70,97   | 8,62           |            |
| AML                           | BM             | heparin           | diagnosis     | M      | 2.45           | 0        | 0        | 7,11           | 0           | 5,59        | 0           | 0             | 0             | 0             | 9,49          | 0             | 0             | 75,13   | 2,68           |            |
| B-ALL                         | BM             | heparin           | diagnosis     | F      | 49             | 0        | 3,39     | 0              | 0           | 0           | 16,19       | 0             | 0             | 0             | 15,64         | 0             | 0             | 0       | 16,64          | 48,13      |
| T-ALL                         | BM             | Heparin           | Diagnosis     | M      | 37             | 3,37     | 0        | 0              | 0           | 22,85       | 0           | 0             | 72,46         | 0             | 0             | 0             | 0             | 0       | 1,32           | 0          |
| T-ALL                         | BM             | EDTA              | Diagnosis     | M      | 54             | 7,59     | 0        | 0              | 0           | 7,87        | 0           | 0             | 79,14         | 0             | 0             | 0             | 0             | 0       | 3,58           | 1,82       |
| MPAL                          | BM             | EDTA              | Diagnosis     | M      | 29             | 1,25     | 0        | 0              | 70,17       | 0           | 0           | 0             | 0             | 0             | 0             | 0             | 0             | 0       | 28,58          | 0          |

Supplemental Table 5. Details of mixed lineage cases

| Final diagnosis (WHO 2008) | Type of tested sample | type of coagulant | Disease phase | Gender    | Age (years) | % Main T | % Main B | % Main Myeloid | % Mixed T/B | % Mixed T/M | % Mixed M/B | % Sector T->B | % Sector T->M | % Sector B->T | % Sector B->M | % Sector M->T | % Sector M->B | % M/T/B | % Unclassified | % Immature |
|----------------------------|-----------------------|-------------------|---------------|-----------|-------------|----------|----------|----------------|-------------|-------------|-------------|---------------|---------------|---------------|---------------|---------------|---------------|---------|----------------|------------|
| B-ALL                      | BM                    | EDTA              | Diagnosis     | F         | 52          | 0        | 84,59    | 1,02           | 0           | 0           | 10,15       | 0             | 0             | 0             | 4,24          | 0             | 0             | 0       | 0              | 0          |
| MPAL                       | BM                    | Heparin           | Diagnosis     | F         | 9           | 0        | 58,67    | 1,04           | 0           | 0           | 31,38       | 0             | 0             | 0             | 8,29          | 0             | 0             | 0       | 0,63           | 0          |
| B-ALL                      | BM                    | EDTA              | Diagnosis     | F         | 4           | 0        | 90,46    | 1,11           | 6,21        | 0           | 0           | 0             | 0             | 0             | 0             | 0             | 0             | 0       | 2,22           | 0          |
| B-ALL                      | BM                    | heparin           | diagnosis     | M         | 45          | 0        | 48,36    | 4,19           | 13,81       | 0           | 20,94       | 0             | 0             | 0             | 10,32         | 0             | 0             | 0       | 0              | 2,38       |
| MPAL                       | BM                    | Heparin           | Diagnosis     | M         | 14          | 0        | 40,1     | 5,86           | 0           | 0           | 39,59       | 0             | 0             | 0             | 0             | 0             | 14,3          | 0       | 0,15           | 0          |
| MPAL                       | BM                    | EDTA              | Diagnosis     | F         | 9           | 0        | 32,05    | 7,9            | 0           | 0           | 19,84       | 0             | 0             | 0             | 0             | 0             | 38,05         | 0       | 1,09           | 1,07       |
| MPAL                       | BM                    | EDTA              | Diagnosis     | F         | 8           | 0        | 71,59    | 8,69           | 0           | 0           | 16,77       | 0             | 0             | 0             | 2,8           | 0             | 0             | 0       | 0,15           | 0          |
| B-ALL                      | BM                    | EDTA              | Diagnosis     | F         | 19          | 0        | 26,93    | 13,74          | 0           | 0           | 48,86       | 0             | 0             | 0             | 0             | 0             | 10,04         | 0       | 0,42           | 0          |
| MPAL                       | BM                    | EDTA              | Diagnosis     | F         | not known   | 0        | 36,52    | 15,93          | 0           | 0           | 20,97       | 0             | 0             | 0             | 21,47         | 0             | 0             | 0       | 2,84           | 2,27       |
| MPAL                       | BM                    | Heparin           | Diagnosis     | F         | 0           | 0        | 62,01    | 16,78          | 10,27       | 0           | 0           | 0             | 0             | 9,63          | 0             | 0             | 0             | 0       | 1,31           | 0          |
| MPAL                       | BM                    | Heparin           | Diagnosis     | M         | 5           | 0        | 7,03     | 21,66          | 0           | 29,18       | 0           | 0             | 0             | 0             | 0             | 8,97          | 0             | 0       | 0,33           | 32,83      |
| MPAL                       | BM                    | EDTA              | Diagnosis     | F         | 6           | 0        | 68,15    | 25,5           | 0           | 0           | 3,85        | 0             | 0             | 0             | 2,5           | 0             | 0             | 0       | 0              | 0          |
| MPAL                       | BM                    | Heparin           | Diagnosis     | F         | 38          | 0        | 51,16    | 35,54          | 0           | 0           | 11,6        | 0             | 0             | 0             | 1,69          | 0             | 0             | 0       | 0,01           | 0          |
| MPAL                       | BM                    | Heparin           | Diagnosis     | M         | 14          | 0        | 3,54     | 38,46          | 0           | 0           | 22,25       | 0             | 0             | 0             | 0             | 0             | 30,43         | 0       | 4,06           | 1,26       |
| MPAL                       | BM                    | Heparin           | Diagnosis     | M         | 67          | 0        | 4,16     | 43,87          | 0           | 0           | 19,2        | 0             | 0             | 0             | 0             | 0             | 22,35         | 0       | 8,23           | 2,19       |
| MPAL                       | BM                    | EDTA              | Diagnosis     | M         | 52          | 0        | 4,79     | 52,29          | 0           | 0           | 18,39       | 0             | 0             | 0             | 0             | 0             | 20,41         | 0       | 0,62           | 3,5        |
| AML                        | BM                    | heparin           | diagnosis     | M         | 62.77       | 0        | 7,11     | 61,48          | 0           | 0           | 22,78       | 0             | 0             | 0             | 8,21          | 0             | 0             | 0       | 0,43           | 0          |
| MPAL                       | PB                    | EDTA              | Diagnosis     | M         |             | 0        | 14,19    | 65,27          | 0           | 0           | 9,59        | 0             | 0             | 0             | 0             | 0             | 9,44          | 0       | 1,52           | 0          |
| MPAL                       | PB                    | EDTA              | Diagnosis     | F         | 0           | 0        | 29,89    | 67,22          | 0           | 0           | 0           | 0             | 0             | 0             | 0             | 0             | 0             | 0       | 2,89           | 0          |
| MPAL                       | BM                    | Heparin           | Diagnosis     | F         | 13          | 0        | 13,05    | 70,3           | 0           | 0           | 10,68       | 0             | 0             | 0             | 0             | 0             | 5,94          | 0       | 0,03           | 0          |
| MPAL                       | BM                    | Heparin           | Diagnosis     | F         | 17          | 0        | 3,25     | 78,85          | 0           | 0           | 1,53        | 0             | 0             | 0             | 0             | 0             | 15,19         | 0       | 1,18           | 0          |
| AML                        | BM                    | heparin           | diagnosis     | V         | 56.34       | 0        | 3,3      | 78,94          | 0           | 0           | 6,15        | 0             | 0             | 0             | 0             | 0             | 11,61         | 0       | 0              | 0          |
| AML                        | BM                    | heparin           | diagnosis     | M         | 15.81       | 1,04     | 0        | 71,31          | 0           | 16,51       | 0           | 0             | 0             | 0             | 0             | 11,13         | 0             | 0       | 0              | 0          |
| AML                        | BM                    | heparin           | diagnosis     | M         | 45.7        | 1,12     | 0        | 55,25          | 0           | 0           | 0           | 0             | 0             | 0             | 0             | 0             | 0             | 0       | 40,48          | 3,14       |
| AML                        | BM                    | EDTA              | Diagnosis     | F         | 69          | 1,17     | 0        | 77,02          | 0           | 8,6         | 0           | 0             | 0             | 0             | 0             | 10,01         | 0             | 0       | 0,46           | 2,74       |
| MPAL                       | PB                    | Heparin           | Diagnosis     | M         | 62          | 1,23     | 0        | 64,75          | 0           | 16,26       | 0           | 0             | 0             | 0             | 0             | 10,43         | 0             | 0       | 0,19           | 7,14       |
| MPAL                       | BM                    | EDTA              | Diagnosis     | F         | 11          | 1,27     | 0        | 86,26          | 0           | 0           | 0           | 0             | 0             | 0             | 0             | 0             | 0             | 0       | 10,65          | 1,82       |
| AUL                        | BM                    | EDTA              | Diagnosis     | M         | 72          | 1,34     | 0        | 26,65          | 0           | 16,48       | 15,86       | 0             | 0             | 0             | 0             | 0             | 35,41         | 4,26    | 0,01           | 0          |
| MPAL                       | BM                    | EDTA              | Relapse       | M         | 13          | 1,35     | 0        | 3,78           | 0           | 18,93       | 10,56       | 0             | 0             | 0             | 0             | 0             | 59,7          | 5,21    | 0,47           | 0          |
| AML                        | BM                    | heparin           | diagnosis     | V         | 59.43       | 1,41     | 0        | 90,73          | 0           | 4,12        | 0           | 0             | 0             | 0             | 0             | 2,45          | 0             | 0       | 0,26           | 1,02       |
| AML                        | PB                    | not known         | Diagnosis     | M         | 0           | 1,71     | 0        | 83,55          | 0           | 0           | 0           | 0             | 0             | 0             | 0             | 0             | 0             | 0       | 14,74          | 0          |
| AML                        | BM                    | heparin           | diagnosis     | F         | 48.9        | 1,74     | 0        | 77,23          | 0           | 4,87        | 0           | 0             | 0             | 0             | 0             | 4,12          | 0             | 10,72   | 1,32           | 0          |
| MPAL                       | BM                    | EDTA              | Diagnosis     | not known | not known   | 1,99     | 0        | 22,57          | 0           | 24,62       | 0           | 0             | 0             | 0             | 0             | 37,83         | 0             | 0       | 0,62           | 12,38      |
| AML                        | BM                    | EDTA              | Diagnosis     | M         | 71          | 2,42     | 0        | 83,11          | 0           | 6,06        | 0           | 0             | 7,24          | 0             | 0             | 0             | 0             | 0       | 1,17           | 0          |
| AML                        | BM                    | EDTA              | Diagnosis     | F         | 64          | 2,23     | 0        | 85,5           | 0           | 0           | 0           | 0             | 0             | 0             | 0             | 0             | 0             | 0       | 10,33          | 1,93       |
| AML                        | PB                    | heparin           | diagnosis     | F         | 76.5        | 2,35     | 0        | 53,9           | 0           | 23,36       | 2,37        | 0             | 0             | 0             | 0             | 15,42         | 0             | 1,66    | 0,93           | 0          |
| AML                        | PB                    | heparin           | diagnosis     | F         | 1.57        | 2,5      | 0        | 7,4            | 0           | 35,1        | 0           | 0             | 0             | 0             | 0             | 52,34         | 0             | 0       | 0,16           | 2,49       |
| MPAL                       | PB                    | EDTA              | Diagnosis     | F         | 30          | 2,79     | 0        | 35,44          | 0           | 17,72       | 3,72        | 0             | 0             | 0             | 0             | 35,58         | 1,76          | 0       | 1,27           | 1,72       |
| AML                        | BM                    | heparin           | diagnosis     | M         | 75.1        | 3,04     | 0        | 10,13          | 0           | 53,16       | 0           | 0             | 0             | 0             | 0             | 9,03          | 0             | 0       | 0,73           | 23,91      |
| MPAL                       | BM                    | EDTA              | Diagnosis     | M         | 17          | 4,36     | 0        | 84,32          | 0           | 3,1         | 0           | 0             | 8,23          | 0             | 0             | 0             | 0             | 0       | 0              | 0          |
| AML                        | PB                    | heparin           | diagnosis     | M         | 2.67        | 4,57     | 0        | 67,84          | 0           | 11,22       | 0           | 0             | 0             | 0             | 0             | 16,22         | 0             | 0       | 0,15           | 0          |
| MPAL                       | BM                    | EDTA              | Diagnosis     | F         | 54          | 5,2      | 0        | 36,85          | 0           | 25,59       | 0           | 0             | 22,66         | 0             | 0             | 0             | 0             | 0       | 0,8            | 8,91       |
| MPAL                       | BM                    | Heparin           | Relapse       | M         | 7           | 6,16     | 0        | 67,14          | 0           | 8,45        | 0           | 0             | 18,13         | 0             | 0             | 0             | 0             | 0       | 0,13           | 0          |
| AML                        | PB                    | EDTA              | Diagnosis     | M         | 81          | 7,62     | 0        | 7,17           | 0           | 16,46       | 0           | 0             | 68,76         | 0             | 0             | 0             | 0             | 0       | 0              | 0          |
| AML                        | BM                    | heparin           | diagnosis     | M         | 75.81       | 7,93     | 0        | 80,99          | 0           | 6,35        | 0           | 0             | 0             | 0             | 0             | 3,44          | 0             | 1,28    | 0,01           | 0          |
| AML                        | BM                    | Heparin           | Diagnosis     | F         | 69          | 7,97     | 0        | 61,08          | 0           | 5,77        | 0           | 0             | 0             | 0             | 0             | 25,12         | 0             | 0       | 0,06           | 0          |
| MPAL                       | BM                    | heparin           | diagnosis     | M         | 69.4        | 9,34     | 0        | 51,15          | 0           | 6,5         | 12,25       | 0             | 0             | 0             | 0             | 0             | 18,67         | 2,07    | 0,02           | 0          |

| Final diagnosis (WHO 2008) | Type of tested sample | type of coagulant | Disease phase | Gender | Age (years) | % Main T | % Main B | % Main Myeloid | % Mixed T/B | % Mixed T/M | % Mixed M/B | % Sector T->B | % Sector T->M | % Sector B->T | % Sector B->M | % Sector M->T | % Sector M->B | % M/T/B | % Unclassified | % Immature |
|----------------------------|-----------------------|-------------------|---------------|--------|-------------|----------|----------|----------------|-------------|-------------|-------------|---------------|---------------|---------------|---------------|---------------|---------------|---------|----------------|------------|
| MPAL                       | BM                    | EDTA              | Diagnosis     | F      | 37          | 9,96     | 0        | 8,31           | 30,92       | 0           | 0           | 48,08         | 0             | 0             | 0             | 0             | 0             | 0       | 2,73           | 0          |
| AML                        | BM                    | Heparin           | Diagnosis     | M      | 10          | 10,82    | 0        | 77,52          | 0           | 5,14        | 0           | 0             | 6,24          | 0             | 0             | 0             | 0             | 0       | 0,28           | 0          |
| AML                        | BM                    | heparin           | diagnosis     | M      | 54.0        | 13,63    | 0        | 72,4           | 4,23        | 3,75        | 0           | 0             | 5,91          | 0             | 0             | 0             | 0             | 0       | 0,07           | 0          |
| AML                        | BM                    | heparin           | diagnosis     | F      | 11          | 14,05    | 0        | 54,86          | 10,99       | 11,87       | 0           | 0             | 8,23          | 0             | 0             | 0             | 0             | 0       | 0              | 0          |
| AML                        | BM                    | Heparin           | Diagnosis     | M      | 14          | 18,62    | 0        | 11,81          | 0           | 41,17       | 0           | 0             | 16,59         | 0             | 0             | 0             | 0             | 0       | 1,03           | 10,78      |
| AML                        | BM                    | heparin           | diagnosis     | M      | 45.34       | 23,97    | 0        | 3,25           | 31,49       | 0           | 0           | 41,17         | 0             | 0             | 0             | 0             | 0             | 0       | 0,12           | 0          |
| MPAL                       | BM                    | Heparin           | Diagnosis     | M      | 13          | 24,73    | 0        | 12,16          | 36,56       | 3,65        | 0           | 21,99         | 0             | 0             | 0             | 0             | 0             | 0       | 0,91           | 0          |
| MPAL                       | BM                    | EDTA              | Diagnosis     | M      | 61          | 41,15    | 0        | 56,63          | 0           | 0           | 0           | 0             | 0             | 0             | 0             | 0             | 0             | 0       | 2,22           | 0          |
| MPAL                       | BM                    | Heparin           | Diagnosis     | M      | 10          | 41,83    | 0        | 1,37           | 0           | 26,28       | 0           | 0             | 16,25         | 0             | 0             | 0             | 0             | 0       | 2,19           | 12,08      |
| MPAL                       | BM                    | EDTA              | Diagnosis     | M      | 35          | 46,1     | 0        | 7              | 15,36       | 3,4         | 0           | 20,08         | 1,02          | 0             | 0             | 0             | 0             | 0       | 0,17           | 6,89       |
| T-ALL                      | BM                    | EDTA              | Diagnosis     | F      | 35          | 51,9     | 0        | 1,47           | 0           | 8,96        | 0           | 0             | 9,87          | 0             | 0             | 0             | 0             | 0       | 1,95           | 25,85      |
| MPAL                       | BM                    | EDTA              | Diagnosis     | M      | 4           | 53,26    | 0        | 43,15          | 0           | 0           | 0           | 0             | 0             | 0             | 0             | 0             | 0             | 0       | 3,6            | 0          |
| T-ALL                      | BM                    | Heparin           | Diagnosis     | M      | 3           | 59,67    | 0        | 1,04           | 0           | 17,97       | 0           | 0             | 17,21         | 0             | 0             | 0             | 0             | 0       | 4,1            | 0          |
| MPAL                       | BM                    | Heparin           | Diagnosis     | F      | 7           | 62,21    | 0        | 35,32          | 0           | 0           | 0           | 0             | 0             | 0             | 0             | 0             | 0             | 0       | 2,47           | 0          |
| MPAL                       | BM                    | EDTA              | Diagnosis     | M      | 73          | 63,06    | 0        | 34,28          | 0           | 0           | 0           | 0             | 0             | 0             | 0             | 0             | 0             | 0       | 2,67           | 0          |
| MPAL                       | BM                    | heparin           | diagnosis     | F      | 63.8        | 68,09    | 0        | 14,5           | 16,39       | 0           | 0           | 0             | 0             | 0             | 0             | 0             | 0             | 0       | 1,02           | 0          |
| T-ALL                      | BM                    | EDTA              | Diagnosis     | F      | 24          | 70,16    | 0        | 3,12           | 0           | 3,99        | 0           | 0             | 22,68         | 0             | 0             | 0             | 0             | 0       | 0,05           | 0          |
| AML                        | BM                    | heparin           | diagnosis     | M      | 56.2        | 73,19    | 0        | 21,47          | 0           | 0           | 0           | 0             | 0             | 0             | 0             | 0             | 0             | 0       | 5,34           | 0          |
| MPAL                       | BM                    | EDTA              | Diagnosis     | M      |             | 80,98    | 0        | 12,2           | 0           | 1,78        | 0           | 0             | 4,95          | 0             | 0             | 0             | 0             | 0       | 0,1            | 0          |
| MPAL                       | BM                    | Heparin           | Diagnosis     | M      | 11          | 85,93    | 0        | 1,18           | 5,92        | 0           | 0           | 6,78          | 0             | 0             | 0             | 0             | 0             | 0       | 0,19           | 0          |
| MPAL                       | BM                    | Heparin           | Diagnosis     | M      | 14          | 93,34    | 0        | 3,87           | 0           | 0           | 0           | 0             | 0             | 0             | 0             | 0             | 0             | 0       | 2,8            | 0          |
| MPAL                       | BM                    | EDTA              | Diagnosis     | F      | 16          | 7,11     | 12,01    | 35,96          | 0           | 19,67       | 8,67        | 0             | 0             | 0             | 0             | 6,91          | 5,7           | 0       | 2,89           | 1,08       |

Supplemental Table 5. Additional immunophenotypic information and review of selected cases

| Category      | Initial diagnosis | Gender    | Age years | % Main   |          |                | % Mixed     |             |             | Diagnosis after review        | Additional immunophenotype <sup>a</sup>                                                                      |
|---------------|-------------------|-----------|-----------|----------|----------|----------------|-------------|-------------|-------------|-------------------------------|--------------------------------------------------------------------------------------------------------------|
|               |                   |           |           | % Main T | % Main B | % Main Myeloid | % Mixed T/B | % Mixed T/M | % Mixed M/B |                               |                                                                                                              |
| typical       | MPAL              | F         | 68        | 0        | 0        | 71,72          | 0           | 0           | 0           | AML with aberrant B-markers   | MPO+/weak CD19+/part or weak CyCD79a+/CD10-/CD22-                                                            |
| typical       | MPAL              | M         | 11        | 0        | 0        | 79,7           | 0           | 0           | 0           | AML with aberrant B-markers   | MPO+/weak CD19+/part or weak CyCD79a+/CD10-/CD22-                                                            |
| typical       | MPAL              | not known | not known | 0        | 80,93    | 0              | 0           | 0           | 0           | B-ALL (weak MPO+)             | CD19+/CyCD79a+/weak MPO+/CD10-/TdT-/CD22+/CD117-/CD13-/weak CD33+                                            |
| typical       | MPAL              | M         | 12        | 0        | 97,72    | 0              | 0           | 0           | 0           | B-ALL (weak MPO+)             | CD19+/CyCD79a+/ weak MPO+/CD10-/TdT+/CD22+/CD117-/CD13-/CD33-                                                |
| B/T/M+mix<10% | MPAL              | F         | 50,1      | 0        | 0        | 56,12          | 0           | 0           | 5,58        | MPAL                          | major myeloid population, small (<10%) B population                                                          |
| B/T/M+mix<10% | MPAL              | F         | 51,2      | 0        | 0        | 33,92          | 0           | 2,03        | 0           | MPAL                          | CD34+/CD117+/HLA-DR+/MPO+/CD13+/CD33+/CD15+/part CD19+/part CyCD79a+/CD10-/CD22-/CD7+                        |
| B/T/M+mix<10% | MPAL              | F         | 12        | 0        | 77,42    | 0              | 0           | 0           | 3,43        | B-ALL (weak MPO+)             | CD10+/CD13-/CD19+/CD22+/CD33-/CD34-/CD117-/CyCD79a+/MPOweak+/TdT+                                            |
| B/T/M+mix>10% | MPAL              | M         | 5         | 0        | 0        | 11,09          | 0           | 0           | 18,08       | AML (t(8;21))                 | CD10-/CD13+/CD15+/CD19+/CD22-/CD33+/CD34+/HLA-DR+/CyCD79-/CD117+/MPO+/TdT-                                   |
| B/T/M+mix>10% | MPAL              | M         | 64        | 0        | 0        | 13,85          | 0           | 13,23       | 0           | MPAL                          | NA                                                                                                           |
| B/T/M+mix>10% | MPAL              | M         | 49        | 0        | 0        | 72,21          | 0           | 15,18       | 0           | AML                           | NA                                                                                                           |
| B/T/M+mix>10% | MPAL              | F         | 12        | 0        | 11,78    | 0              | 0           | 0           | 14,37       | MPAL (IKZF1del)               | CD10+/CD13 weak+/CD19+/CD20partly+/CD22+/CD33-/CD34partly+/CD117-/CyCD79+/HLA-DR+/MPO+/TdT+                  |
| B/T/M+mix>10% | MPAL              | F         | 25        | 0        | 11,96    | 0              | 0           | 0           | 23,54       | MPAL                          | CD19+/CyCD79a+/MPO+/CD10+/CD22+/part CD34+/Cymu+/TdT+/weak CD33+/CD13-/CD20-                                 |
| B/T/M+mix>10% | MPAL              | M         | 7         | 35,62    | 0        | 0              | 34,88       | 5,9         | 0           | MPAL                          | CD34-/CD117weak+/TdT-/CD19weak+/CD10-/CyCD79a partly+/CyCD3weak+/CD4-/CD5-/CD7+/CD8-                         |
| B/T/M+mix>10% | MPAL              | M         | 13        | 30,02    | 0        | 0              | 47,53       | 0           | 0           | MPAL                          | CD19part+/cyCD79a part+/CD34+/CD7+/cyCD3+/CD3-/TdT+/CD10dim/CD22-/CD117part dim/CD2-/CD5dim/CD1a-/CD4-/CD8-  |
| Atypical      | MPAL              | M         | 0         | 0        | 0        | 1,97           | 0           | 0           | 6,52        | T-ALL with aberrant B-markers | CD19dim/cyCD79a+/CD34+/CD7+/cyCD3+/CD3-TdTdim/CD10-/CD2+/CD5dim/CD1a-/CD4-/CD8-                              |
| Atypical      | MPAL              | F         | 10        | 0        | 0        | 5,05           | 0           | 5,51        | 0           | MPAL                          | CD2+/CyCD3weak+/CD3-/CD4-/CD5+/CD7+/CD8-/CD10-/CD13weak+/CD33+/CD34+/CD117+/MPOpartly+/TdT-/                 |
| Atypical      | MPAL              | M         | 29        | 1,25     | 0        | 0              | 70,17       | 0           | 0           | NA                            | NA                                                                                                           |
| Mixed         | B-ALL             | F         | 52        | 0        | 84,59    | 1,02           | 0           | 0           | 10,15       | B-ALL                         | CD19+/CD79a+/CD10+/CD34+/Cymu+/CD13+/CD33+/MPO-                                                              |
| Mixed         | B-ALL             | F         | 4         | 0        | 90,46    | 1,11           | 6,21        | 0           | 0           | B-ALL (hyperdiploid)          | CD19het/cyCD79a+/CD34+/MPO-/CD10+TdT+/CD22+/CD13-/CD33-/CD117-                                               |
| Mixed         | B-ALL             | M         | 45        | 0        | 48,36    | 4,19           | 13,81       | 0           | 20,94       | B-ALL (t(9;22))               | CD19+/CyCD79a-/small part CD22+/part CD10+/CyCD3-/MPO-/het CD34+/TdT+/CD13-/CD33-                            |
| Mixed         | B-ALL             | F         | 19        | 0        | 26,93    | 13,74          | 0           | 0           | 48,86       | B-ALL (MLL-AF1P)              | CD34-/CD19+/CD7-/CyCD3-/weak CyCD79a+/CD10-/weak CD22+/TdT+/CD13-/CD33-/NG2+                                 |
| Mixed         | AML               | M         | 62,77     | 0        | 7,11     | 61,48          | 0           | 0           | 22,78       | AML                           | weak CD45+/CD34+/CD117+ /HLA-DR+ /CD133+/CD13+ /CD33+ /het CD19+ /CD4+ /weak MPO+ /part cyCD79a+             |
| Mixed         | AML               | V         | 56,34     | 0        | 3,3      | 78,94          | 0           | 0           | 6,15        | AML (7q-)                     | CD34+/CD117+/weak CD45+ /HLA-DR+/CD13+/het CD33+ /TdT+ /MPO-/cyCD79a-                                        |
| Mixed         | AML               | M         | 15,81     | 1,04     | 0        | 71,31          | 0           | 16,51       | 0           | AML (+8)                      | CD34-/CD117+/CD13+/CD33+/CD38+/CD7+/MPO-/part HLA-DR+/weak CD4+/part CD36+/part CD11b+                       |
| Mixed         | AML               | M         | 45,7      | 1,12     | 0        | 55,25          | 0           | 0           | 0           | AML                           | CD34+/CD117+/HLA-DR+ /part TdT+/CD13+/part CD56+ /het CD33+/part CD7+/CD22+/small part MPO+/cyCD79a-/cyCD3-  |
| Mixed         | AML               | F         | 69        | 1,17     | 0        | 77,02          | 0           | 8,6         | 0           | AML                           | NA                                                                                                           |
| Mixed         | AML               | V         | 59,43     | 1,41     | 0        | 90,73          | 0           | 4,12        | 0           | AML (-5)                      | CD34+/CD117+/HLADR+/weak CD45+/part MPO+/CyCD3-/CD19-/CD13+/CD33+/part CD7+/part CD56+                       |
| Mixed         | AML               | M         | 0         | 1,71     | 0        | 83,55          | 0           | 0           | 0           | TMD (Down)                    | part CD34+/CD117+/weak CD45+/HLADR+/CD36+/CD64-/het CD42b+/CD13-/CD33+/MPO-/CD7+/weak CD4+                   |
| Mixed         | AML               | F         | 48,9      | 1,74     | 0        | 77,23          | 0           | 4,87        | 0           | AML (EV11)                    | CD34+/CD117+/weak CD45+/CD13+/CD33+/part CD7+/part MPO+/part CD15+/part CD64+                                |
| Mixed         | AML               | M         | 71        | 2,42     | 0        | 83,11          | 0           | 6,06        | 0           | AML                           | NA                                                                                                           |
| Mixed         | AML               | F         | 64        | 2,23     | 0        | 85,5           | 0           | 0           | 0           | unknown (AML or MPAL T/M?)    | NA                                                                                                           |
| Mixed         | AML               | F         | 76,5      | 2,35     | 0        | 53,9           | 0           | 23,36       | 2,37        | AML (EV11)                    | CD34+/weak CD45+/MPO-/CyCD79a-/CD7+/CyCD3-/CD13+/part CD117+/CD33+/HLA-DR+/CD11b+                            |
| Mixed         | AML               | F         | 1,57      | 2,5      | 0        | 7,4            | 0           | 35,1        | 0           | AML (Down)                    | CD34+/CD117+/CD19-/CyCD3-/MPO-/part CD13+/HLADR-/weak CD45+/CD33+/CD36+/CD11b+/CD41+/CD42b+/CD61.42+         |
| Mixed         | AML               | M         | 75,1      | 3,04     | 0        | 10,13          | 0           | 53,16       | 0           | AML                           | CD34+/CD117+/weak CD45+/CD13+/het CD33+/strongCD7+/CD15+/MPO-/CyCD3-/CyCD79a-                                |
| Mixed         | AML               | M         | 2,67      | 4,57     | 0        | 67,84          | 0           | 11,22       | 0           | AML (Down)                    | part CD34+/CD117+/weak CD45+/MPO-/part CD33+/CD36+/CD42.CD61+/part CD56+/part CD7+                           |
| Mixed         | AML               | M         | 81        | 7,62     | 0        | 7,17           | 0           | 16,46       | 0           | AML                           | NA                                                                                                           |
| Mixed         | AML               | M         | 75,81     | 7,93     | 0        | 80,99          | 0           | 6,35        | 0           | AML                           | part CD34+/CD117+/HLADR+/weak CD45+/small part MPO+/CD13+/CD33-/CD7+/CD56-                                   |
| Mixed         | AML               | F         | 69        | 7,97     | 0        | 61,08          | 0           | 5,77        | 0           | BPDCN                         | part CD34+/part CD7+/CyCD3-/CD19-/CyCD79a-/MPO-/small part CD117+/CD13+/CD33-/HLADR+/CD36+/CD123+/CD22+/CD4+ |
| Mixed         | AML               | M         | 10        | 10,82    | 0        | 77,52          | 0           | 5,14        | 0           | BPDCN                         | CyCD3weak+/CD3-/CD7+/CD34+/MPO-/TdT+/CD5-/CD10-/CD2-/CD117-/CD4+/CD8+/CD33+/HLA-DR+/CD123+/CD13-/CD36+       |
| Mixed         | AML               | M         | 54,0      | 13,63    | 0        | 72,4           | 4,23        | 3,75        | 0           | AML                           | CD34+/CD117+/MPO-/CD13+/CD33+/CyCD3-/CD19-/CD7+/HLADR+/part CD11b+                                           |



| Category | Initial diagnosis | Gender | Age years | % Main   |          |         | % Mixed | % Mixed | % Mixed | Diagnosis after review | Additional immunophenotype <sup>a</sup>                                                                   |
|----------|-------------------|--------|-----------|----------|----------|---------|---------|---------|---------|------------------------|-----------------------------------------------------------------------------------------------------------|
|          |                   |        |           | % Main T | % Main B | Myeloid | T/B     | T/M     | M/B     |                        |                                                                                                           |
| Mixed    | AML               | F      | 11        | 14,05    | 0        | 54,86   | 10,99   | 11,87   | 0       | AML (M0; MLL)          | CD34+/CD117+/weak CD45+/HLADR-/CyCD3-/CD19-/MPO-/CD7+/CD13-/CD33-/weak CD11b+                             |
| Mixed    | AML               | M      | 14        | 18,62    | 0        | 11,81   | 0       | 41,17   | 0       | AML (M0; MLL)          | CD34+/part CD117+/part HLADR+/MPO-/weak CD19+/CyCD3-/CD10-/CD22-/CyCD79a-/CD13-/part CD33+/CD7+/part TdT+ |
| Mixed    | AML               | M      | 45.34     | 23,97    | 0        | 3,25    | 31,49   | 0       | 0       | B-ALL / MPAL?          | CD34-/CD117-/HLA-DR+/part TdT+/CD13-/part CD33+/CD7+/weak CD19+/part CD5+/MPO-/weak cyCD79a+/CyCD3-       |
| Mixed    | T-ALL             | F      | 35        | 51,9     | 0        | 1,47    | 0       | 8,96    | 0       | T-ALL                  | CyCD3+/SmCD3-/MPO-/CD19-/CD34+/CD7+/TdT-/CD2-/CD13+/CD5+/CD4-/CD8-/CD33+/HLADR-/CD1a-/CD10-               |
| Mixed    | T-ALL             | M      | 3         | 59,67    | 0        | 1,04    | 0       | 17,97   | 0       | T-ALL                  | CyCD3+/SmCD3-/CD1a+/CD2+/CD34-/weak CD7+/CD45+/part weak TdT+/CD10-/part CD8+/CD4+/CD5+                   |
| Mixed    | T-ALL             | F      | 24        | 70,16    | 0        | 3,12    | 0       | 3,99    | 0       | ETP-ALL                | CyCD3+/SmCD3-/CD5-/CD7+/CD2-/CD34+/CD45RA+/CD13+/CD1a-/CD4-/CD8-/TCR-                                     |
| Mixed    | AML               | M      | 56.2      | 73,19    | 0        | 21,47   | 0       | 0       | 0       | AML                    | CD34+/CD117+/weak CD45+/HLADR+/part MPO+/part CyCD3+/CD13+/CD33-/part CD15+/CD2+/CD7+/TdT+/CD5-           |

<sup>a</sup> Abbreviations: NA=not available; het=heterogeneous; part=partially.
